# Supplementary material for: Regulation of antitumour CD8 T-cell immunity and checkpoint blockade immunotherapy by Neuropilin-1
Source: PubMed Central journal article supplement (PMC6659631; doi:10.1038/s41467-019-11280-z), 2019-07-26
Supplement: 41467_2019_11280_MOESM1_ESM.pdf [file 41467_2019_11280_MOESM1_ESM.pdf]

## Supplementary Information

Regulation of anti-tumor CD8 T-cell immunity and checkpoint blockade immunotherapy by Neuropilin-1

Leclerc M et al.,

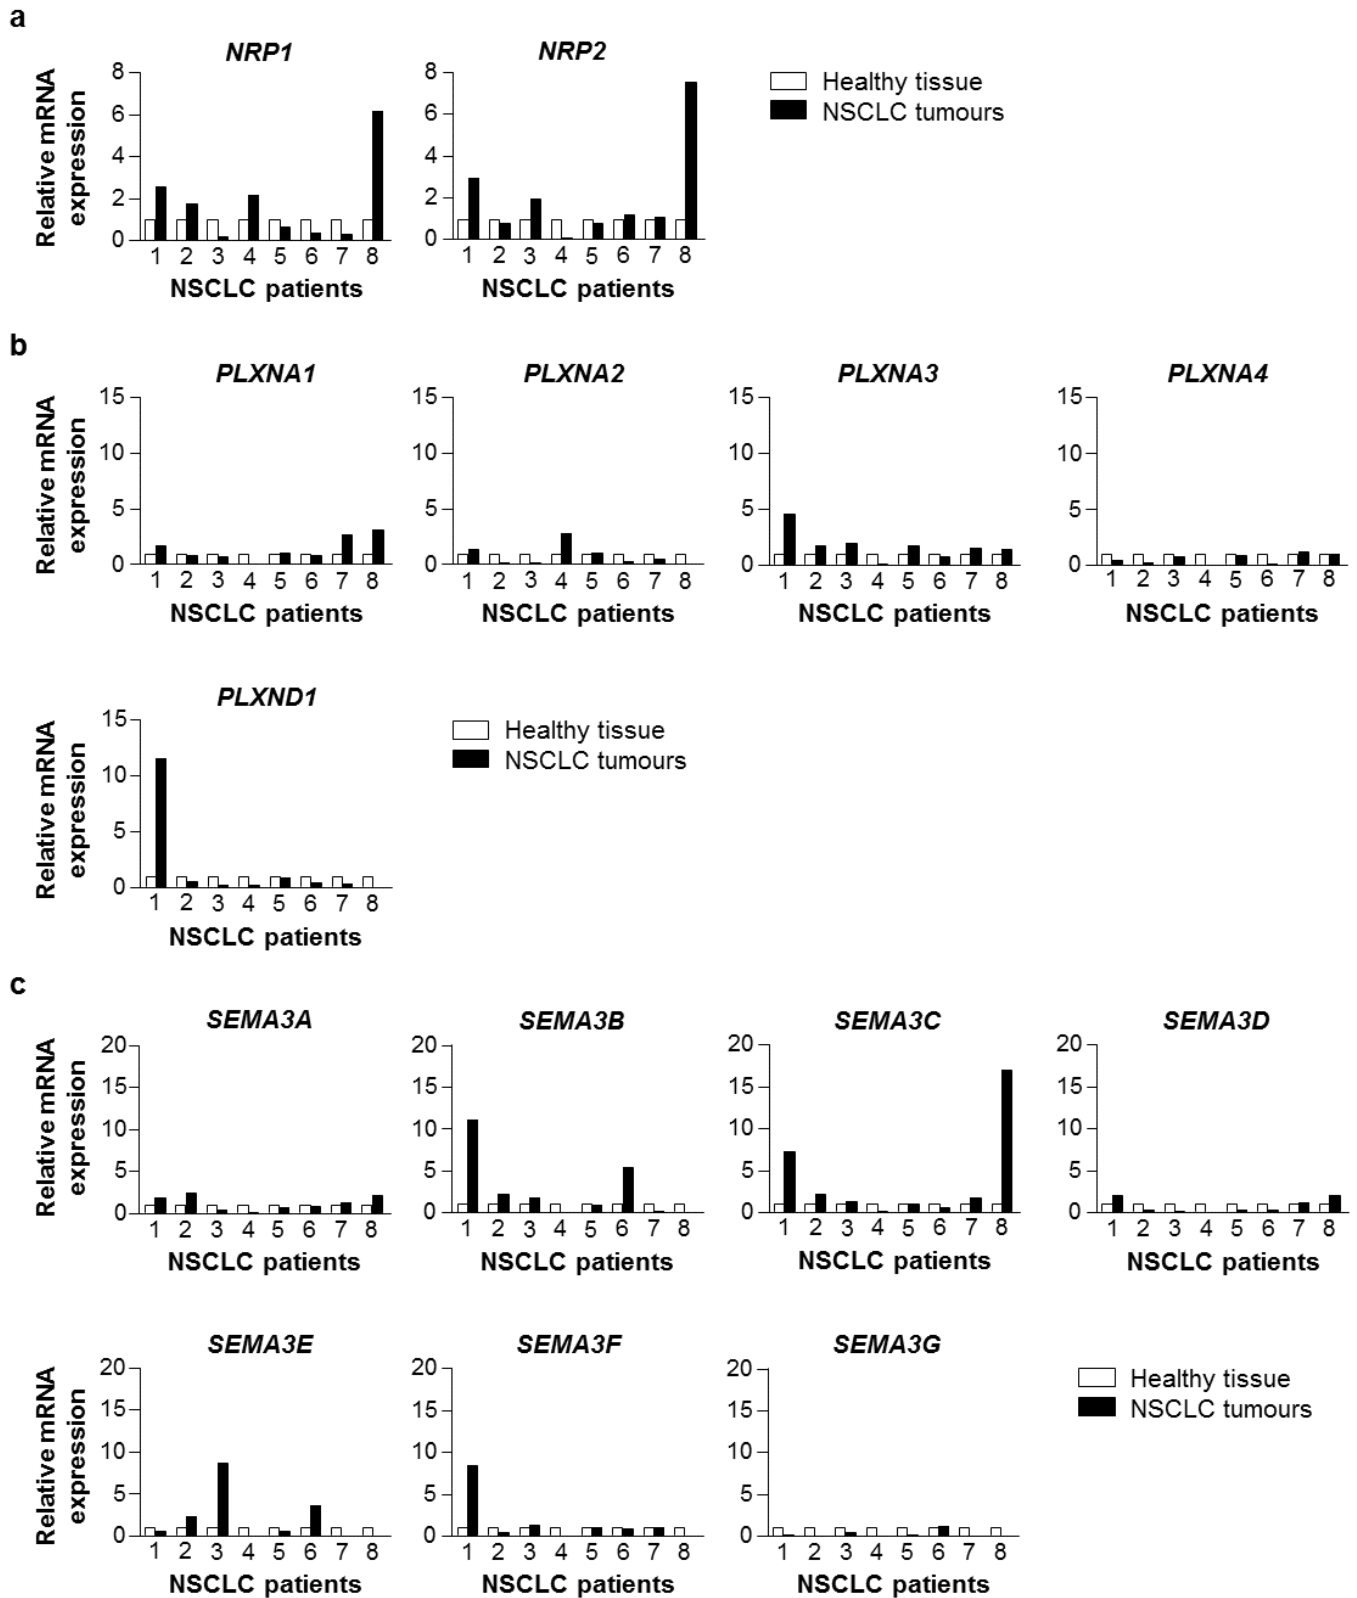

**Supplementary Figure 1:** Expression of *NRP*, *PLXN* and *SEMA3* genes in human lung tumour samples and autologous healthy lung tissues. **a.** Relative expression of *NRP1* and *NRP2* transcripts in fresh NSCLC tumours performed by qRT-PCR analysis. **b.** Relative expression of *PLXNA1*, *PLXNA2*, *PLXNA3*, *PLXNA4* and *PLXND1* transcripts in NSCLC tumours performed by qRT-PCR analysis. **c.** Relative expression of *SEMA3A*, *SEMA3B*, *SEMA3C*, *SEMA3D*, *SEMA3E*, *SEMA3F* and *SEMA3G* transcripts in fresh human lung tumours. Expression was normalized to autologous healthy lung tissues (n=8). Sequences of primer pairs are provided in Supplementary Table 3.

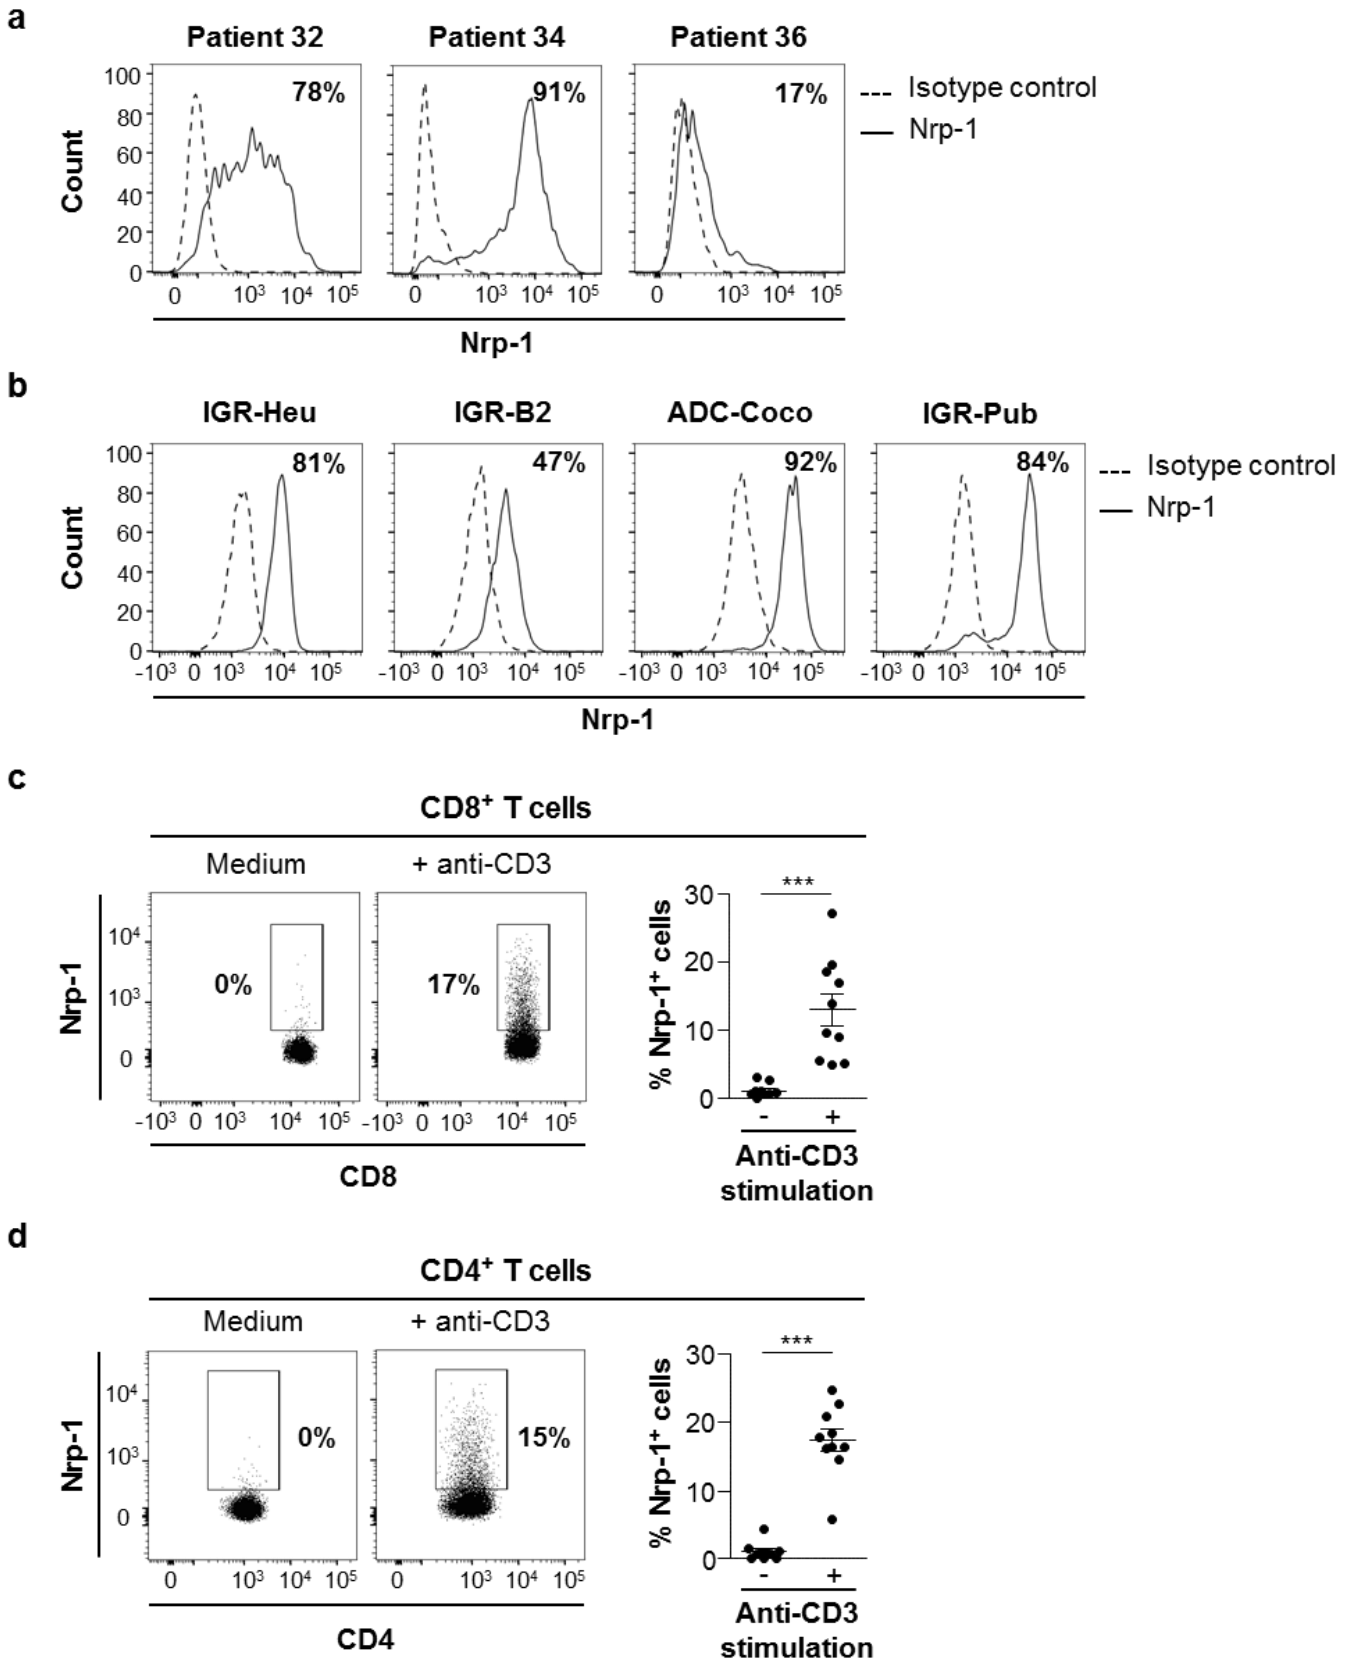

**Supplementary Figure 2:** Expression of Nrp-1 in human cells. **a.** Surface expression of Nrp-1 on freshly isolated NSCLC tumours cells was determined by immunofluorescence analysis. Percentages of positive cells are indicated. Full line: anti-Nrp-1; dashed line: isotypic control mAb. **b.** Surface expression of Nrp-1 in human NSCLC tumour cell lines was determined by immunofluorescence analysis. Percentages of positive cells are indicated. Full line: anti-Nrp-1; dashed line: isotypic control mAb. **c.** Expression of Nrp-1 on CD8<sup>+</sup> T lymphocytes from healthy donor PBL unstimulated (medium) and stimulated with immobilized anti-CD3 mAb (n=10). **d.** Expression of Nrp-1 on CD4<sup>+</sup> T lymphocytes from healthy donor PBL unstimulated (medium) and stimulated with immobilized anti-CD3 (n=10). Means  $\pm$  SEM two-tailed Student's paired t test (**c**, **d**). \*\*\*  $P \leq 0.001$ .

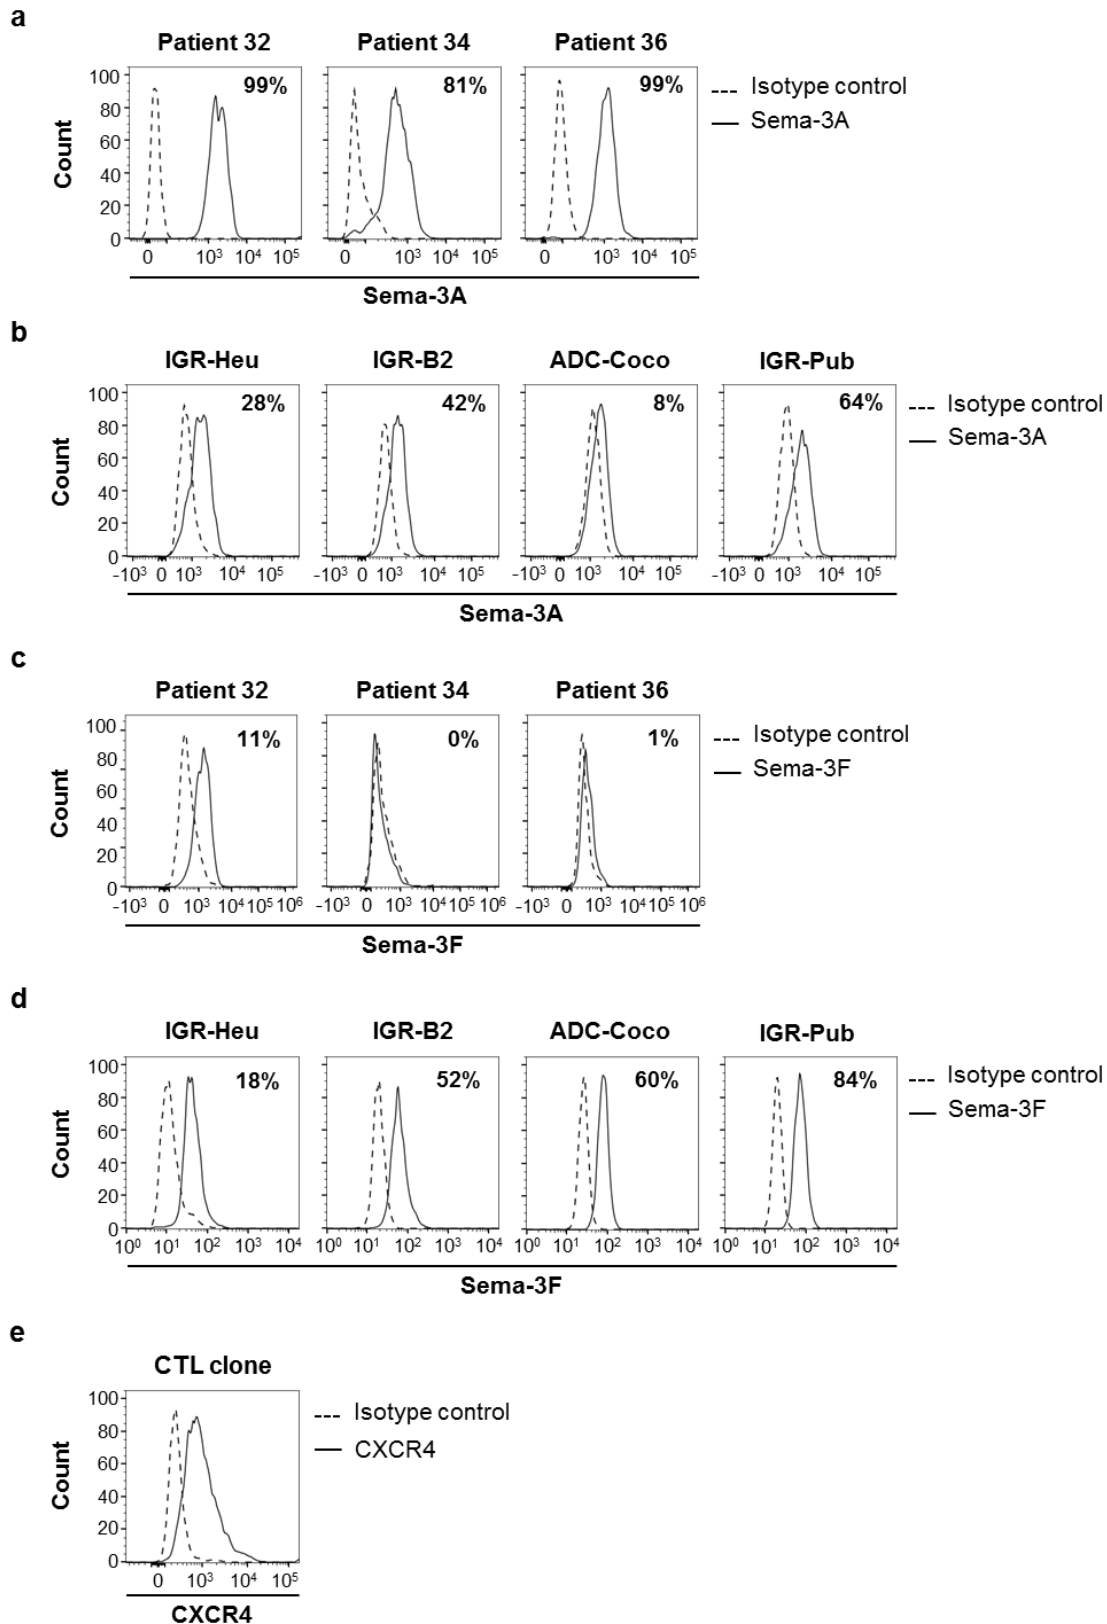

**Supplementary Figure 3:** Expression of Sema-3A, Sema-3F and CXCR4 in human cells. **a.** Intracellular expression of Sema-3A in freshly isolated human NSCLC tumours cells was determined by intracellular immunofluorescence analysis. Percentages of positive cells are indicated. Full line: anti-Sema-3A; dashed line: isotypic control. **b.** Intracellular expression of Sema-3A in NSCLC tumour cell lines was determined by immunofluorescence. Percentages of positive cells are indicated. Full line: anti-Sema-3A; dashed line: isotypic control. **c.** Intracellular expression of Sema-3F in freshly isolated human NSCLC tumours cells was determined by intracellular immunofluorescence analysis. Percentages of positive cells are indicated. Full line: anti-Sema-3F; dashed line: isotypic control. **d.** Intracellular expression of Sema-3F in NSCLC tumour cell lines was determined by immunofluorescence. Percentages of positive cells are indicated. Full line: anti-Sema-3F; dashed line: isotypic control. **e.** Expression of CXCR4 chemokine receptor on the human P62 CTL clone surface. Full line: anti-CXCR4 mAb; dashed line: isotypic control.

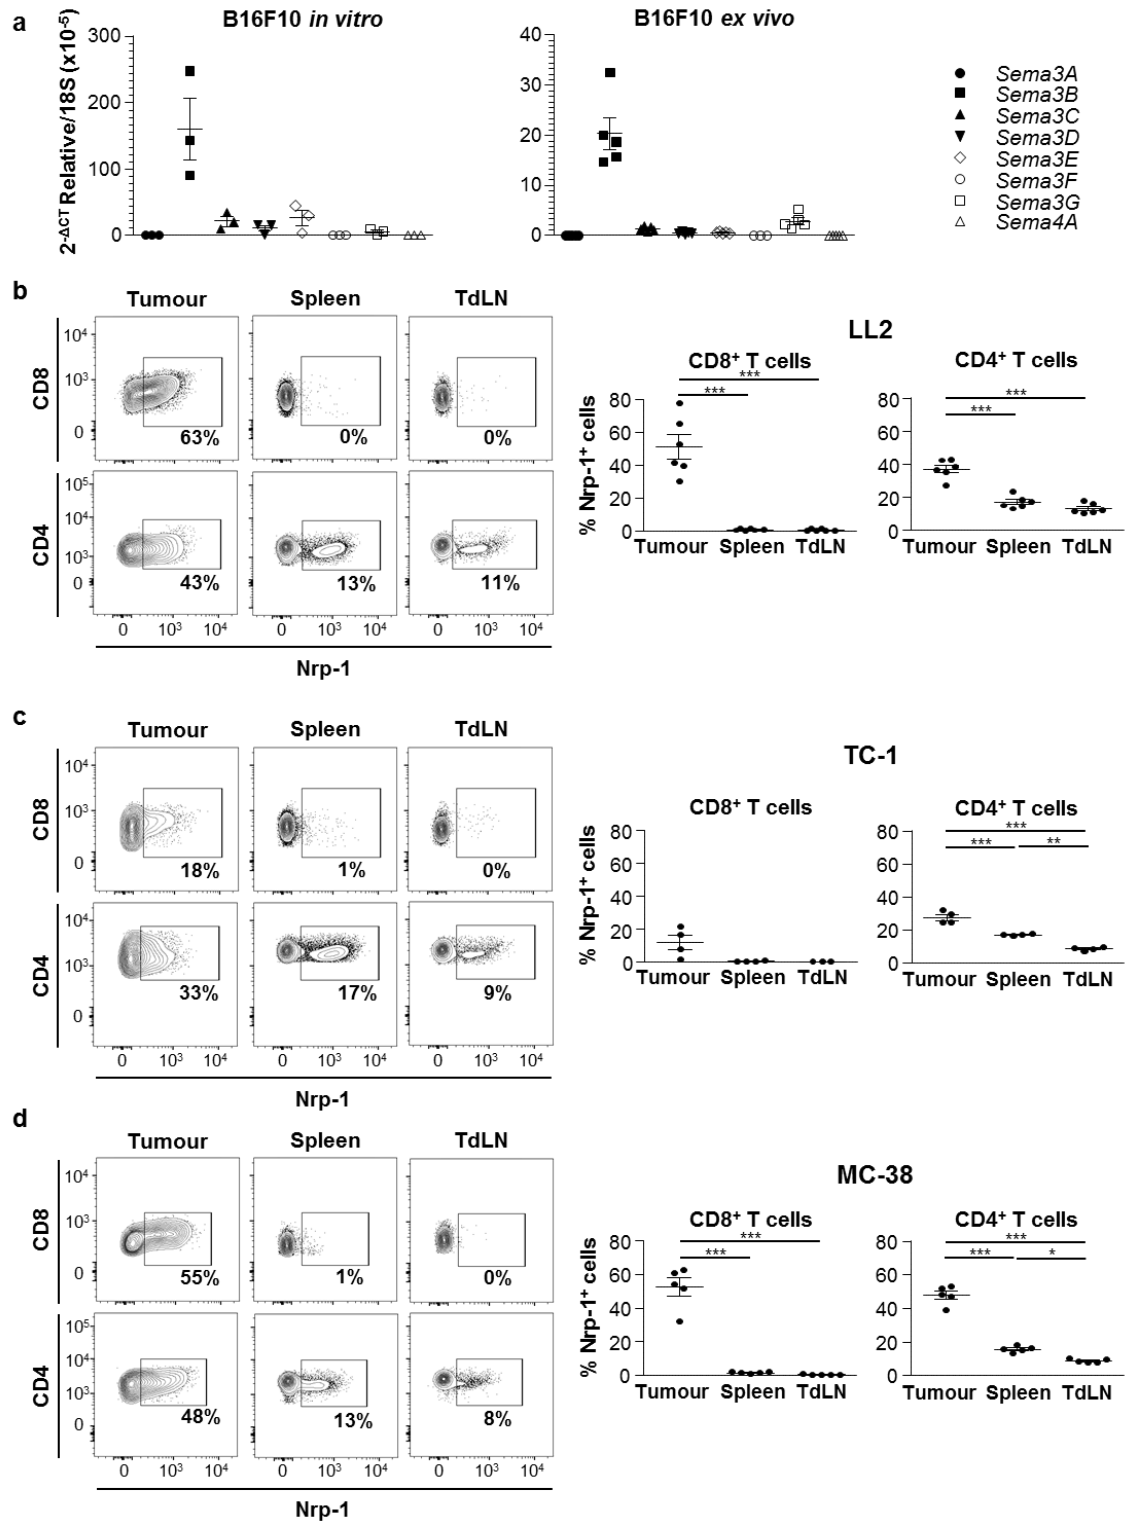

**Supplementary Figure 4:** Expression of Sema-3B and Nrp-1 in murine tumour and T cells. **a.** Relative expression of *Sema3A*, *Sema3B*, *Sema3C*, *Sema3D*, *Sema3E*, *Sema3F*, *Sema3G* and *Sema4A* transcripts in B16F10 tumour cells cultured *in vitro* (left) or engrafted in C57BL/6 mice (right) was determined by qRT-PCR analysis. **b.** Surface expression of Nrp-1 on CD4<sup>+</sup> and CD8<sup>+</sup> T cells infiltrating LL2 lung tumour cells engrafted in C57BL/6 mice at day 15. T lymphocytes from spleens and TdLN of tumour-bearing mice were analysed in parallel. Right: percentages of Nrp-1<sup>+</sup> cells among CD8<sup>+</sup> and CD4<sup>+</sup> T cells in TIL, splenocytes and TdLN (n=6). **c.** Surface expression of Nrp-1 on CD4<sup>+</sup> and CD8<sup>+</sup> T cells infiltrating TC-1 lung tumour cells engrafted in C57BL/6 mice at day 15. T lymphocytes from spleens and TdLN of tumour-bearing mice were analysed in parallel. Right: percentages of Nrp-1<sup>+</sup> cells among CD8<sup>+</sup> and CD4<sup>+</sup> T cells in TIL, splenocytes and TdLN (n=4). **d.** Surface expression of Nrp-1 on CD4<sup>+</sup> and CD8<sup>+</sup> T cells infiltrating MC-38 colon tumour cells engrafted in C57BL/6 mice at day 15. T lymphocytes from spleens and TdLN of tumour-bearing mice were analysed in parallel. Right: percentages of Nrp-1<sup>+</sup> cells among CD8<sup>+</sup> and CD4<sup>+</sup> T cells in TIL, splenocytes and TdLN (n=5). Means  $\pm$  SEM one-way ANOVA test with Bonferroni correction (**b**, **c**, **d**). \*  $P \leq 0.05$ ; \*\*  $P \leq 0.01$ ; \*\*\*  $P \leq 0.001$ . Sequences of primer pairs are provided in Supplementary Table 3.

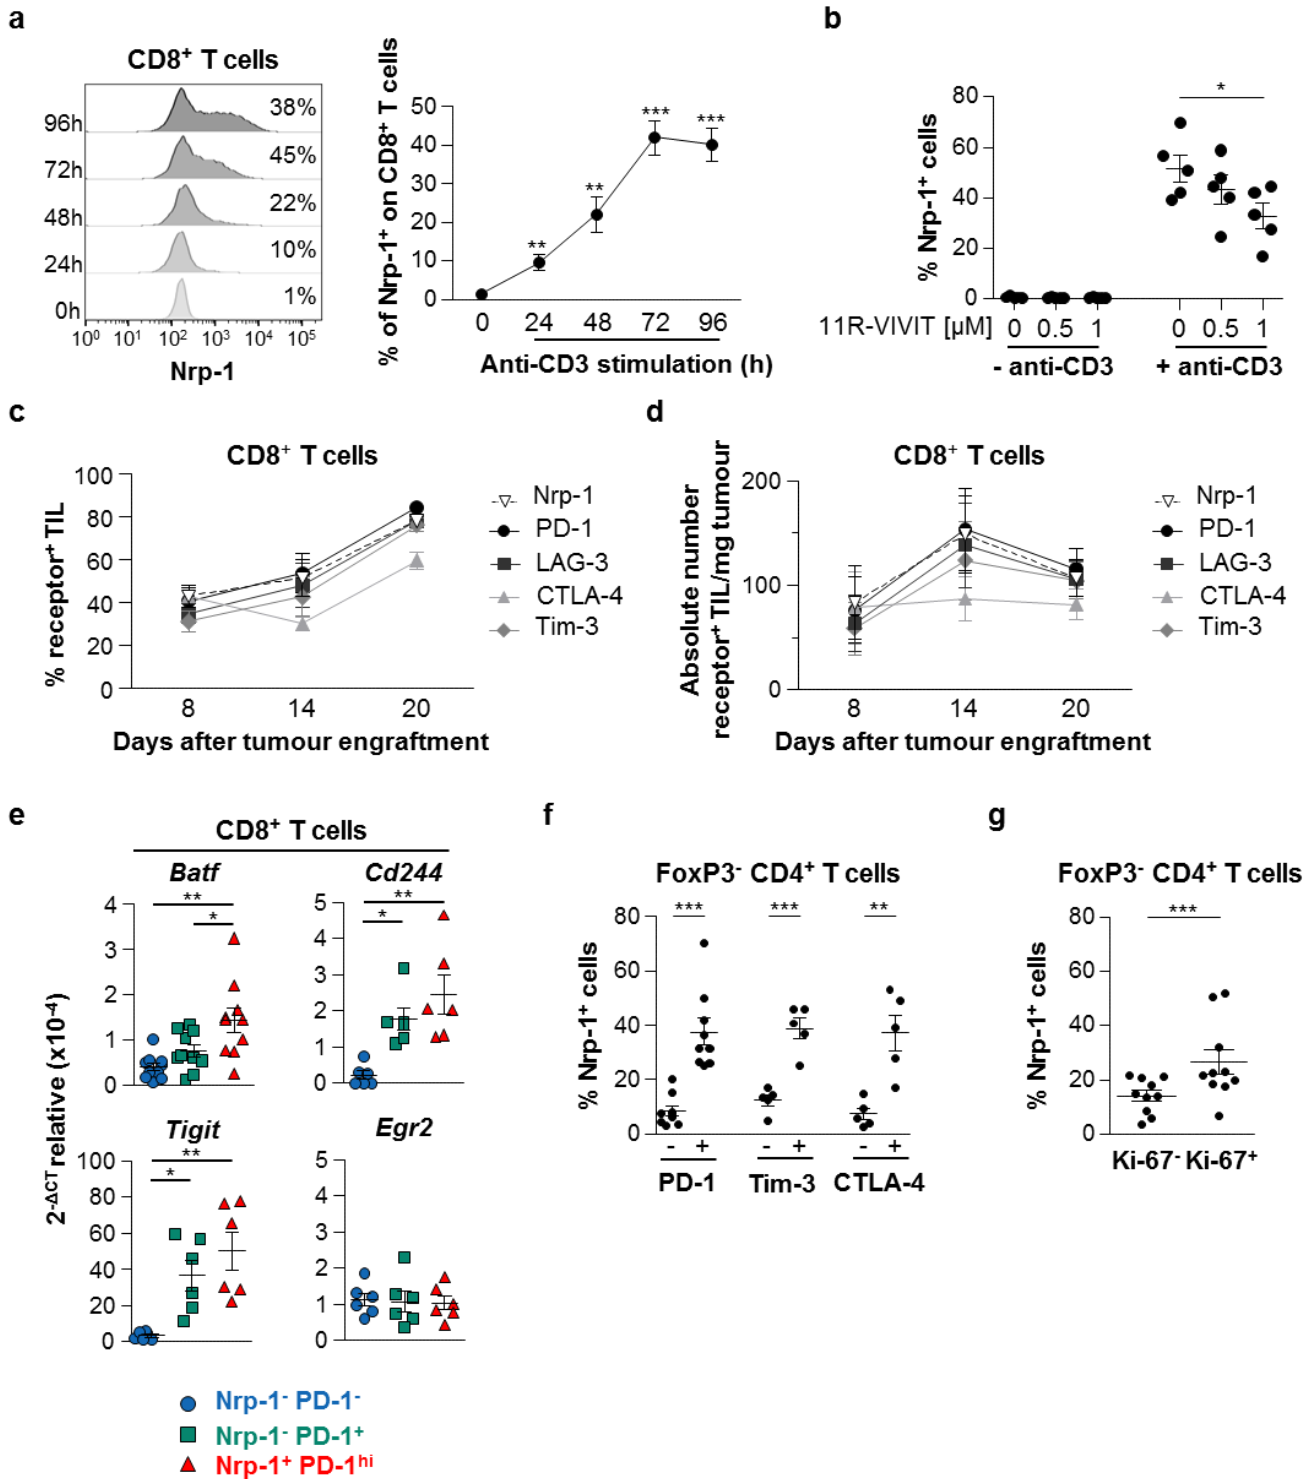

**Supplementary Figure 5:** Expression of Nrp-1 and transcription factors in TIL from the B16F10 melanoma model. **a.** Kinetic studies of Nrp-1 expression on CD8<sup>+</sup> T cells from naive mouse splenocytes unstimulated or stimulated with immobilized anti-CD3 mAb. **b.** The NFAT inhibitor 11R-VIVIT inhibits expression of Nrp-1 induced by anti-CD3 activation on CD8<sup>+</sup> T cells from naive mouse splenocytes in a dose-dependent manner. **c.** Kinetic studies of Nrp-1, PD-1, LAG-3, CTLA-4 and Tim-3 induction on CD8<sup>+</sup> TIL from B16F10 melanoma engrafted in C57BL/6 mice. Percentages of inhibitory receptor-expressing CD8<sup>+</sup> T lymphocytes are shown. **d.** Absolute numbers of CD8<sup>+</sup> TIL expressing Nrp-1, PD-1, LAG-3, CTLA-4 or Tim-3 per milligram of tumour. **e.** Relative expression of *Batf*, *Cd244*, *Tigit* and *Egr2* transcripts in Nrp-1<sup>+</sup>PD-1<sup>hi</sup>, Nrp-1<sup>+</sup>PD-1<sup>+</sup> and Nrp-1<sup>+</sup>PD-1<sup>-</sup> CD8<sup>+</sup> T-cell subsets from B16F10 TIL was determined by qRT-PCR analysis at day 15 after tumour engraftment. **f.** Percentages of Nrp-1<sup>+</sup> on Foxp3<sup>-</sup> CD4<sup>+</sup> T lymphocytes from B16F10 expressing or not PD-1 (n=9), Tim-3 (n=5) or CTLA-4 (n=5). **g.** Percentages of Nrp-1<sup>+</sup> on Foxp3<sup>-</sup> CD4<sup>+</sup> T lymphocytes infiltrating B16F10 melanoma expressing or not Ki-67(n=10). Means ± SEM one-way ANOVA test with Bonferroni correction (**a**, **b**, **e**) or two-tailed Student's unpaired t test (**f**, **g**). \* *P* < 0.05; \*\* *P* < 0.01; \*\*\* *P* < 0.001. Primer pairs are provided in Supplementary Table 3.

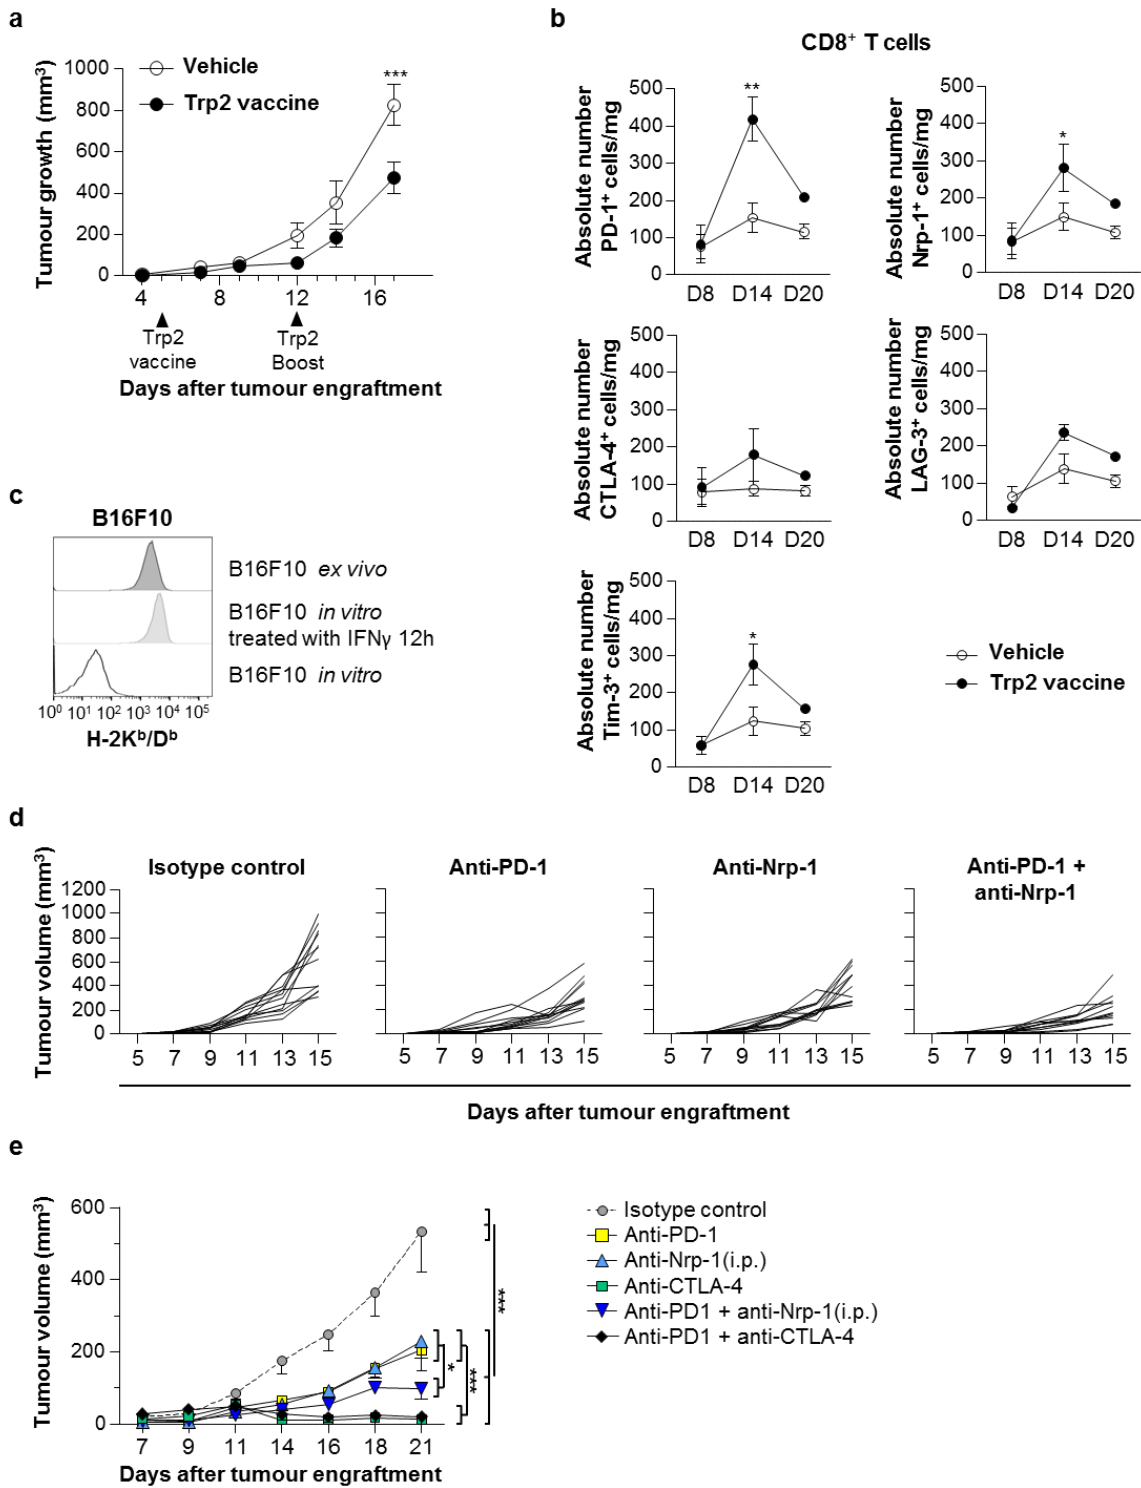

**Supplementary Figure 6:** Growth and infiltration of murine tumours engrafted in C57BL/6 mice. **a.** Mice were engrafted with B16F10 cells and then vaccinated with Trp2 peptide delivered with poly(I:C) at indicated time points (arrows) or with poly(I:C) control alone (vehicle). Tumour volumes are given as means ( $\pm$  SEM) of 5 mice/group. **b.** Kinetic studies of inhibitory receptor expression on CD8<sup>+</sup> T cells infiltrating B16F10. Absolute numbers of CD8<sup>+</sup> T cells expressing inhibitory receptors in TIL from Trp-2-vaccinated mice and control mice. Numbers of PD-1<sup>+</sup>, Nrp-1<sup>+</sup>, LAG-3<sup>+</sup>, CTLA-4<sup>+</sup> and Tim-3<sup>+</sup> CD8<sup>+</sup> TIL per milligram of tumour are determined. **c.** Increase in MHC-I expression on B16F10 cells cultured in the presence of IFN $\gamma$  or engrafted in C57BL/6 mice. H2-K<sup>b</sup>/D<sup>b</sup> expression profiles of B16F10 cells cultured *in vitro* in medium alone or with IFN $\gamma$  for 12 h, or isolated *ex vivo* at day 15. **d.** Growth of B16F10 tumours engrafted in C57BL/6 mice treated with blocking anti-Nrp-1, -PD-1, a combination of both mAb or an isotype control. Individual mouse tumours are shown. **e.** C57BL/6 mice were engrafted with MC-38 tumour cells and then treated i.p. with anti-PD-1, anti-Nrp-1 or anti-CTLA-4, or a combination of anti-PD-1 plus anti-Nrp-1 or anti-PD-1 plus anti-CTLA-4 mAb injected at days 4, 7, 10 and 16 after tumour inoculation. Tumour volumes are given as means ( $\pm$  SEM) of 5 mice/group. Means  $\pm$  SEM two-way ANOVA test with Bonferroni correction (**a**, **b**, **e**). \*  $P < 0.05$ ; \*\*  $P < 0.01$ ; \*\*\*  $P < 0.001$ .

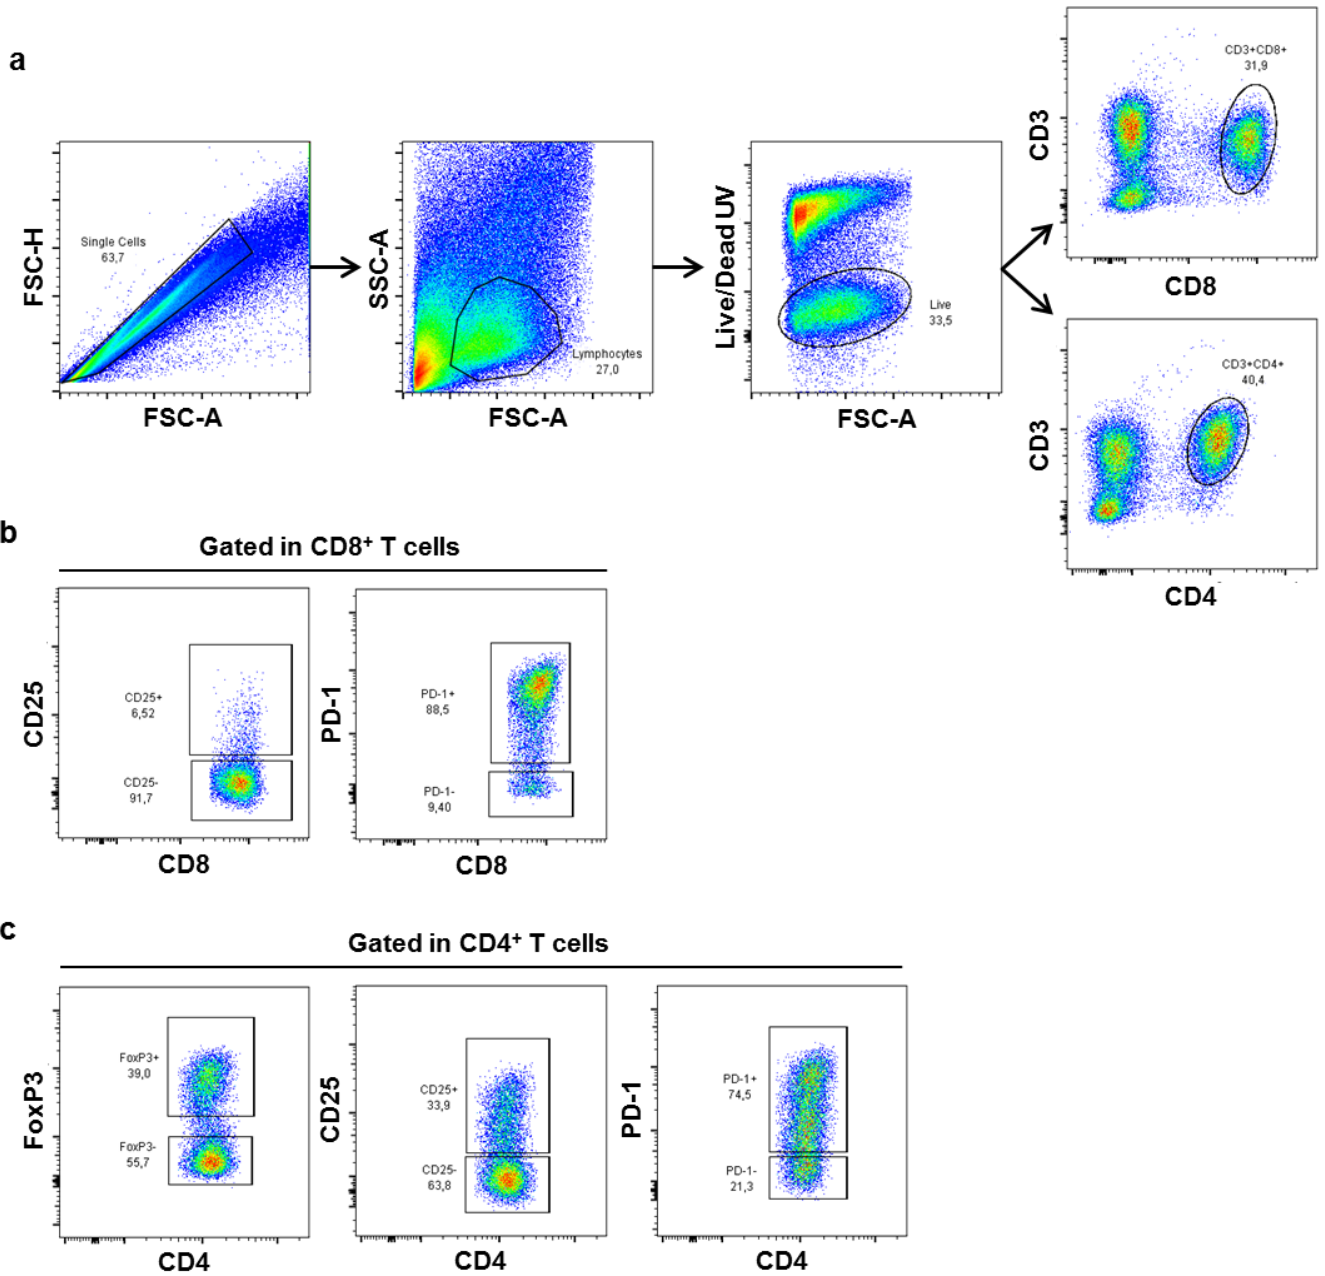

**Supplementary Figure 7:** Gating strategy for human T cells. Representative flow cytometry plot illustrating gating strategy identifying CD3<sup>+</sup>CD8<sup>+</sup> cells and CD3<sup>+</sup>CD4<sup>+</sup> cells from NSCLC tumour (a). Representative flow cytometry plot illustrating gating for CD25 and PD-1 in CD8<sup>+</sup> T cells from NSCLC tumour (b). Representative flow cytometry plot illustrating gating for FoxP3, CD25 and PD-1 in CD4<sup>+</sup> T cells from NSCLC tumour (c).



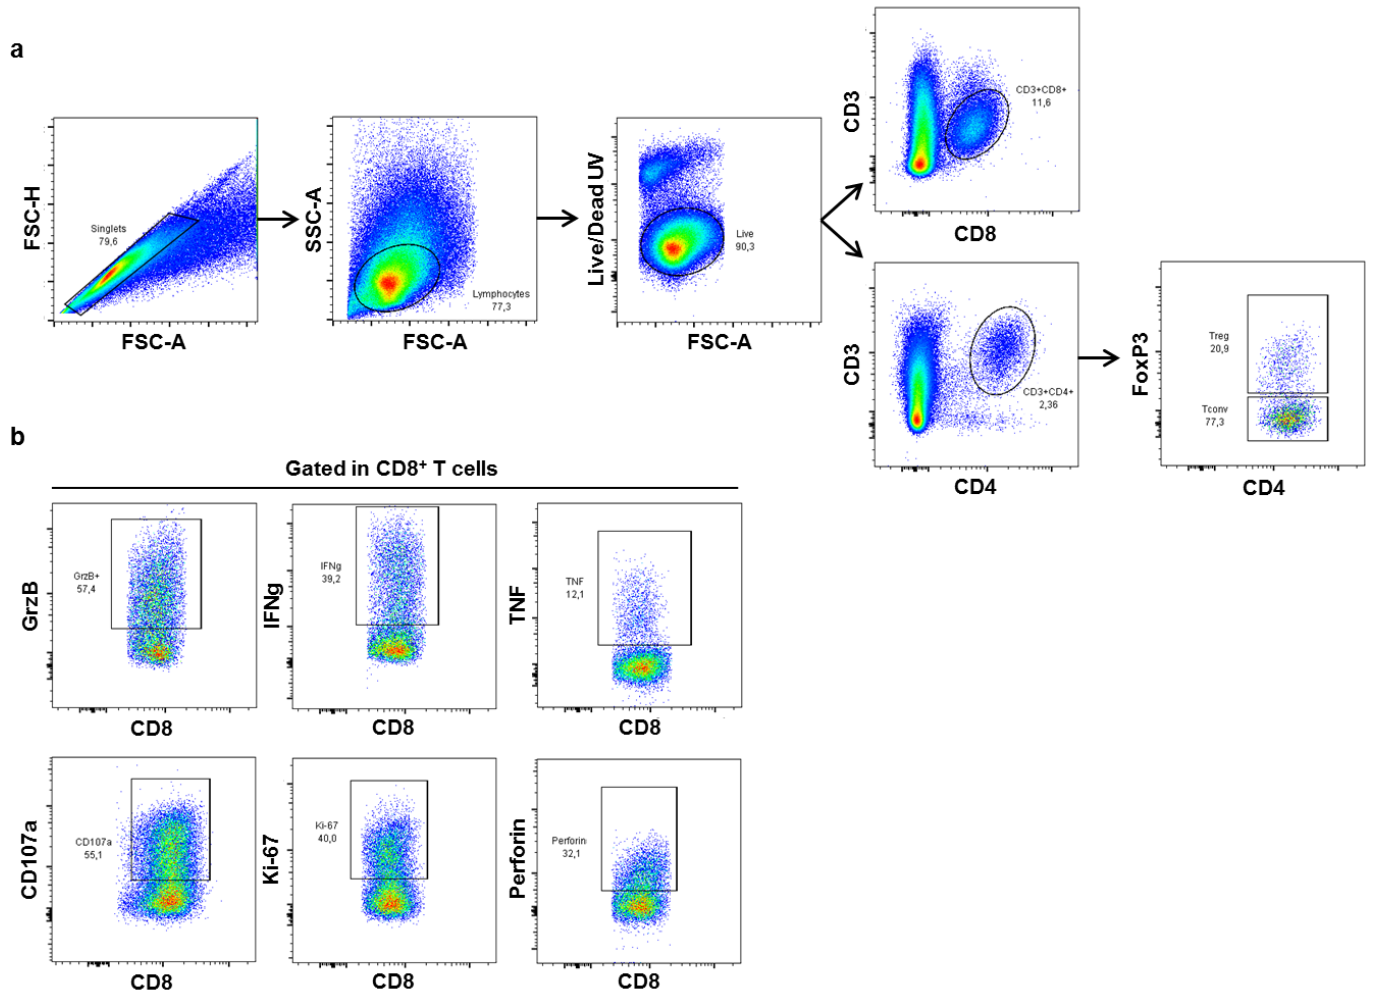

**Supplementary Figure 8:** Gating strategy for mouse T cells. Representative flow cytometry plot illustrating gating strategy identifying CD3<sup>+</sup> CD8<sup>+</sup> cells and CD3<sup>+</sup> CD4<sup>+</sup> cells (FoxP3<sup>-</sup> and FoxP3<sup>+</sup>) from mouse tumour, spleen and TdLN (a). Representative flow cytometry plot illustrating gating for GrzB, IFN $\gamma$ , TNF, CD107a, Ki-67 and Perforin in CD8<sup>+</sup> T cells from mouse tumour (b).

**Supplementary Table 1:** Absence of correlation between Nrp-1 and FoxP3 expression in CD4<sup>+</sup> TIL

| <b>Patient</b> | <b>% Nrp-1</b>                                         |                                                        |
|----------------|--------------------------------------------------------|--------------------------------------------------------|
|                | <b>CD3<sup>+</sup>CD4<sup>+</sup>FoxP3<sup>-</sup></b> | <b>CD3<sup>+</sup>CD4<sup>+</sup>FoxP3<sup>+</sup></b> |
| <b>1</b>       | 12.20                                                  | 9.64                                                   |
| <b>2</b>       | 10.70                                                  | 9.87                                                   |
| <b>3</b>       | 1.38                                                   | 31.50                                                  |
| <b>4</b>       | 7.28                                                   | 14.00                                                  |
| <b>5</b>       | 14.00                                                  | 16.60                                                  |
| <b>6</b>       | 9.65                                                   | 9.14                                                   |
| <b>7</b>       | 21.20                                                  | 10.70                                                  |
| <b>8</b>       | 6.27                                                   | 8.56                                                   |
| <b>9</b>       | 8.17                                                   | 12.80                                                  |
| <b>MEAN</b>    | <b>10.09</b>                                           | <b>13.65</b>                                           |
| <b>SEM</b>     | <b>3.94</b>                                            | <b>4.70</b>                                            |

**Supplementary Table 2: B16F10 tumour growth in treated mice**

| <b>Day</b> | <b>Treatment</b> |                  |                   |                               |
|------------|------------------|------------------|-------------------|-------------------------------|
|            | <b>Isotype</b>   | <b>Anti-PD-1</b> | <b>Anti-Nrp-1</b> | <b>Anti-PD-1 + anti-Nrp-1</b> |
| <b>7</b>   | 12.04 ± 1.66     | 12.71 ± 4.34     | 10.33 ± 2.06      | 8.49 ± 2.70                   |
| <b>9</b>   | 46.10 ± 9.34     | 44.34 ± 18.64    | 44.00 ± 9.50      | 19.76 ± 5.63                  |
| <b>11</b>  | 167.77 ± 23.51   | 99.99 ± 23.96    | 111.47 ± 23.45    | 68.74 ± 15.24                 |
| <b>13</b>  | 299.72 ± 53.88   | 159.44 ± 24.18   | 199.60 ± 27.74    | 116.50 ± 21.49                |
| <b>15</b>  | 575.06 ± 122.19  | 321.55 ± 53.43   | 410.45 ± 67.29    | 213.22 ± 44.58                |

Mean values of tumour volumes are in mm<sup>3</sup> ± SEM

**Supplementary Table 3:** List of human and mouse primer pairs used

| <b>Human Gene</b> | <b>Primer1 ( Forward) 5' - 3'</b> | <b>Primer2 (Reverse) 5' - 3'</b> |
|-------------------|-----------------------------------|----------------------------------|
| <i>NRP1</i>       | CAAGACTTACAAGATCGACG              | AGAACAGGTTTGTTCCTTC              |
| <i>NRP2</i>       | AGGTATTTCAAGCCAACAAC              | CGGATTCTAACAAACCTTGTC            |
| <i>PLXNA1</i>     | AGAGGTACTATGCAGACATC              | TGTACTTGGTGATGTAGGAG             |
| <i>PLXNA2</i>     | CTGATCTATCTGCGGGTATC              | CTGACAAATATCTTCCCTGTC            |
| <i>PLXNA3</i>     | GAGGTATTATCGAGACATTGC             | CTTGGTGACATAGAAATACAGC           |
| <i>PLXNA4</i>     | GAAAACATGATCCGGTACAC              | AGGTAGATTTCCAGACACCATC           |
| <i>PLXND1</i>     | GTGACTATGGGAACAACATC              | AGTCGTAGATGGTGAAATTG             |
| <i>SEMA3A</i>     | GATCCAAAGTTCATTAGTGCC             | GCATATCTGACCTATTCTAGC            |
| <i>SEMA3B</i>     | AGGACATTGGTACTGAGTG               | CATCCTCTATCCTTCCTGG              |
| <i>SEMA3C</i>     | ATCAATGAGGAGCTTTTCTC              | TTCTCTTGGTTAAACTTCG              |
| <i>SEMA3D</i>     | GAACTGTCCTCAAAGTTGTC              | TGCTTGAATATCTGCAACTC             |
| <i>SEMA3E</i>     | GCAGAGAATACTGGTGAATAAG            | CACTGGATTCTTATGATCTCTG           |
| <i>SEMA3F</i>     | CTTTACTTCTTCTCCGTGAG              | ATCAAAGTGAGTCTCAATGC             |
| <i>SEMA3G</i>     | CAAGGTGTACTTCTTCTTCTC             | AAAGTGCTCCATTTGTTTAC             |
| <i>18S</i>        | CGGACAGGATTGACAGATTG              | CAAATCGCTCCACCAACT               |

| <b>Mouse Gene</b> | <b>Primer1 ( Forward) 5' - 3'</b> | <b>Primer2 (Reverse) 5' - 3'</b>  |
|-------------------|-----------------------------------|-----------------------------------|
| <i>Sema3A</i>     | TGGGCTGGTTCACTGGGATTGC            | CTGGAGCTGTTGGCCAAGCCAT            |
| <i>Sema3B</i>     | GCTGTCTTCTCCACCTCCAG              | ACATGCCAGGTCTTGGGTAG              |
| <i>Sema3C</i>     | ATG GCC ACT CTT GCT CTA GG        | CAT CTT GTC TTC GGC TCC TC        |
| <i>Sema3D</i>     | GGA AAA GCG ACA AGA GTT GC        | TGA AAA TTT TGT TTT TCA AAC ACT G |
| <i>Sema3E</i>     | GGG GCA GAT GTC CTT TTG A         | AGT CCA GCA AAC AGC TCA TTC       |
| <i>Sema3F</i>     | GAA GGA GGA ACG CGG AAG           | AGG CAG TGA CAA GCA TCG T         |
| <i>Sema3G</i>     | GAAGCCGAGATGCCCTTTAC              | GTCTTTTCCCTTGCGGACAC              |
| <i>Sema4A</i>     | CATGTATCTGGGTACCTCCAC             | GGACTGTCAGGACTTCTTTAATTA          |
| <i>Batf</i>       | GGCAAACAGGACTCATCTGATGATG         | GGCAGCCCCGGCCTCAGTTTACATG         |
| <i>Cd244</i>      | AATTGGACAGGCGTGTCTTCT             | TCTCCAGGGAAAGTCTGCTG              |
| <i>Egr2</i>       | CTACCCGGTGGAAAGACCTC              | AATGTTGATCATGCCATCTCC             |
| <i>Tigit</i>      | CCACAGCAGGCACGATAGATA             | CATGCCACCCCAGGTCAAC               |
| <i>18S</i>        | CGGACAGGATTGACAGATTG              | CAAATCGCTCCACCAACT                |
